# Supplementary material for: Laminin Receptor-Mediated Nanoparticle Uptake by Tumor Cells: Interplay of Epigallocatechin Gallate and Magnetic Force at Nano–Bio Interface
Source: MDPI journal article supplement (doi:10.3390/pharmaceutics14081523), 2022-07-22
Supplement: s1 [file s1]

# Supplementary Materials: Laminin Receptor-Mediated Nanoparticle Uptake by Tumor Cells: Interplay of Epigallocatechin Gallate and Magnetic Force at Nano-Bio Interface

Sheng-Chieh Hsu, Nian-Ping Wu, Yi-Ching Lu and Yunn-Hwa Ma

pharmaceutics-1790631-Video S1.avi.

**Video S1:** EGCG enhanced MNP aggregation and internalization by glioma cells.

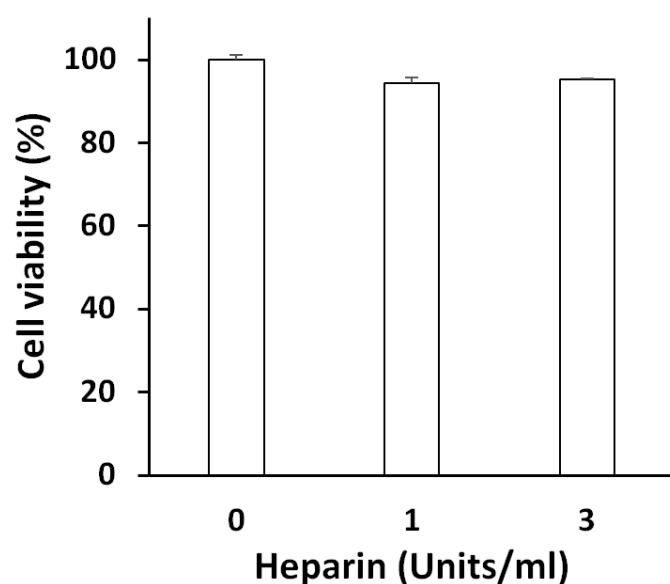

**Figure S1.** Heparin did not exhibit an effect on LN-229 cell viability. After 24 h treatment with heparin (1 and 3 Unit/mL), cell viability was determined by CCK-8 assay.

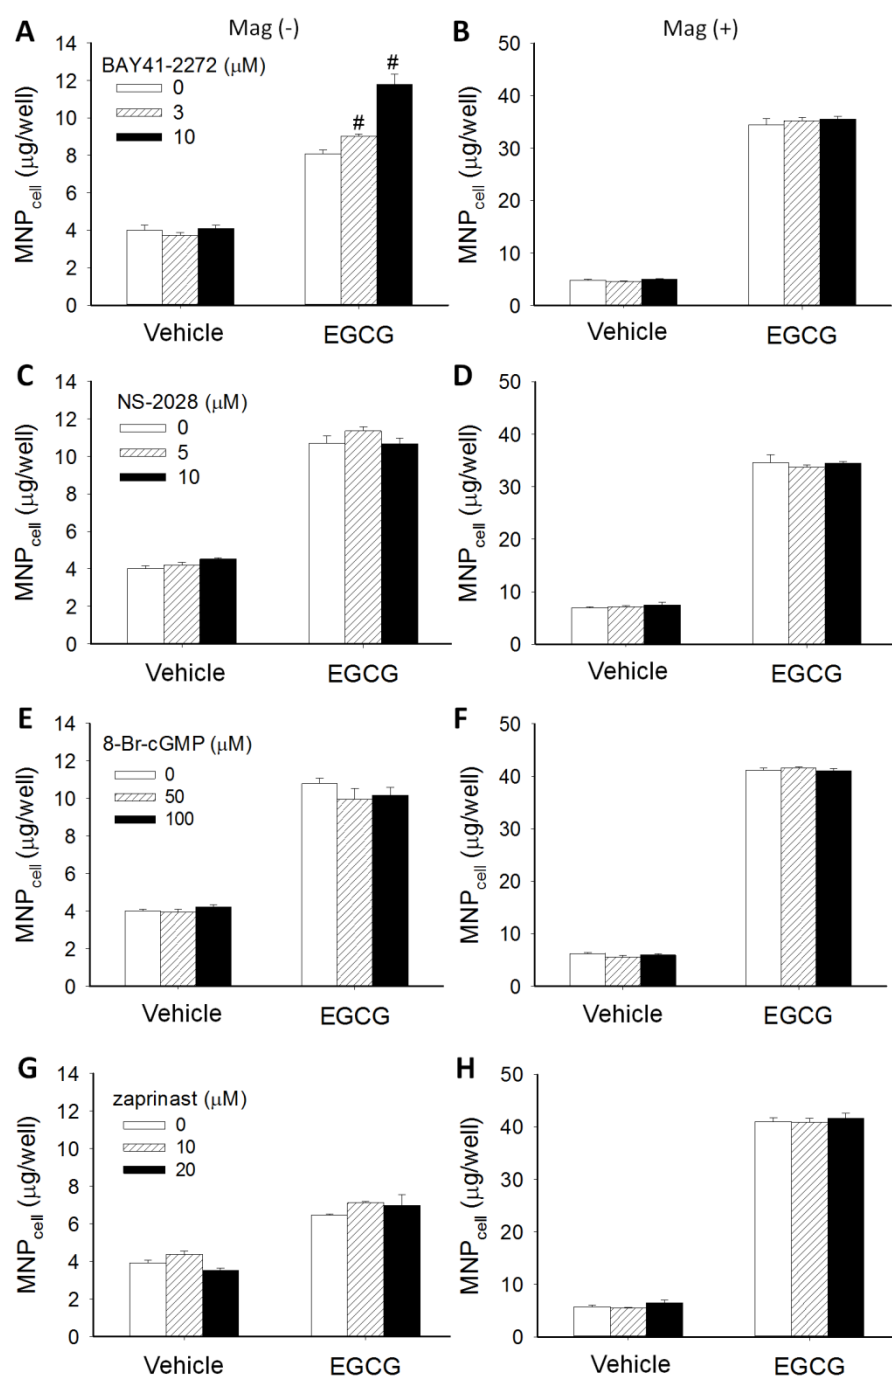

**Figure S2.** Effects of pharmacological agents that modulate cGMP levels on EGCG-induced MNP uptake. Cell-associated MNPs (MNP<sub>cell</sub>) were determined in response to BAY41-2272 (an activator of soluble guanylate cyclase, 3 or 10 μM; (A,B), NS-2028 (an inhibitor of soluble guanylate cyclase, 5 or 10 μM; (C,D), 8-Br-cGMP 50 or 100 μM; (E,F) or zaprinast (a PDE inhibitor, 10 or 20 μM; (G,H). LN-229 cells exposed to MNPs (CMX-MNP; 50 μg/well) and EGCG (10 μM) in the absence (left panels; Mag-) or presence (right panels; Mag+) of magnet for 2 h. Values are mean ± SEM (n = 4); the results are representative of 3 experiments using different batch of cells. # *p* < 0.05 compared with corresponding group without BAY41-2272.

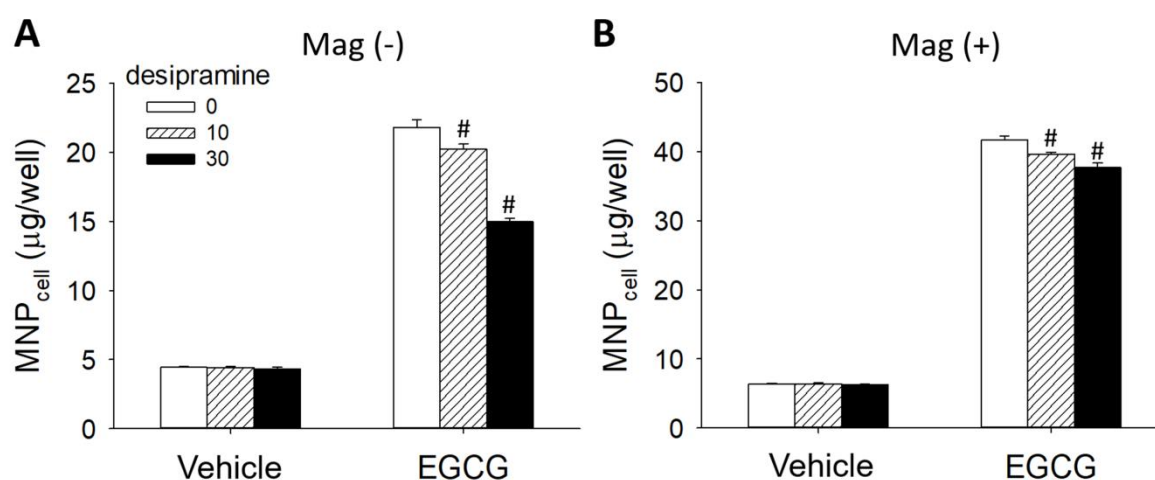

**Figure S3.** Acid sphingomyelinase inhibitor attenuated EGCG-induced MNP uptake. After 30-min pretreatment with desipramine (an acid sphingomyelinase inhibitor; 10 or 30  $\mu$ M), LN-229 cells were incubated with MNPs (dextran-MNP: 50  $\mu$ g/well) and EGCG (10  $\mu$ M) in the absence (**A**) or presence (**B**) of the magnet for 6 h. Values are mean  $\pm$  SEM ( $n = 4$ ); the results are representative of 4 experiments using different batch of cells. #  $p < 0.05$  compared with corresponding group without desipramine.
